# Supplementary material for: Clinicopathological significance of CHFR promoter methylation in gastric cancer: a meta-analysis
Source: PubMed Central journal article supplement (PMC5839373; doi:10.18632/oncotarget.23394), 2017-12-16
Supplement: oncotarget-09-10083-s001.pdf [file oncotarget-09-10083-s001.pdf]

# Clinicopathological significance of *CHFR* promoter methylation in gastric cancer: a meta-analysis

## SUPPLEMENTARY MATERIALS

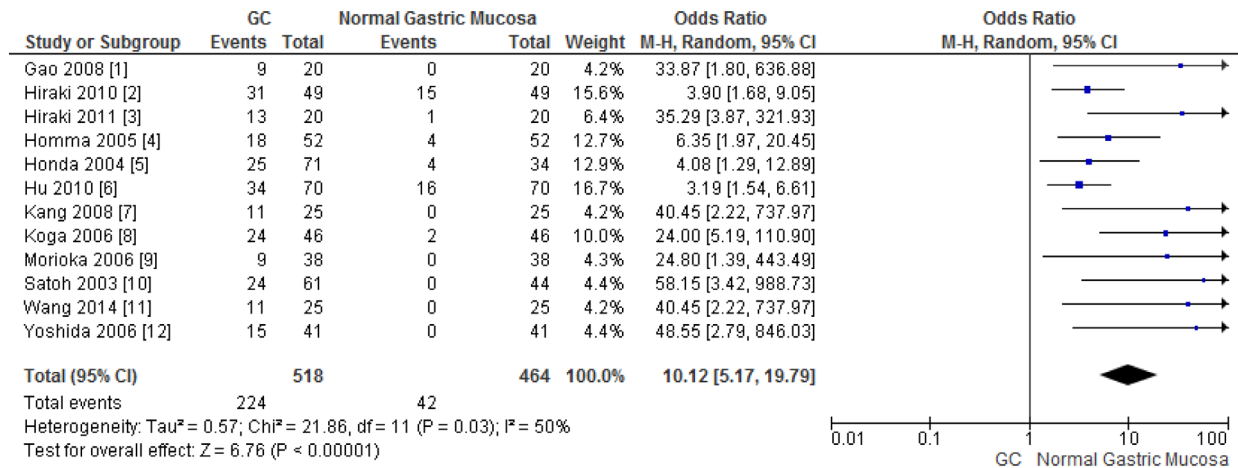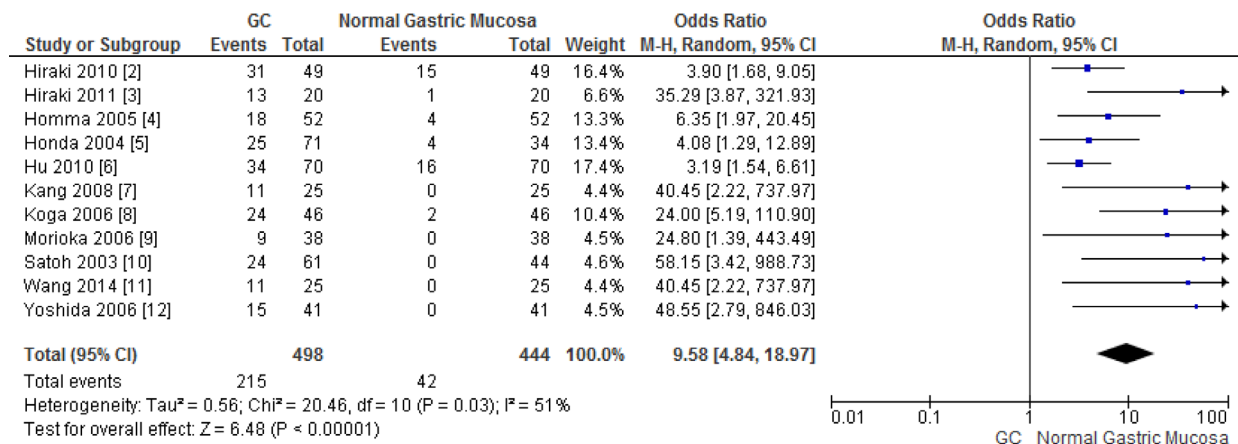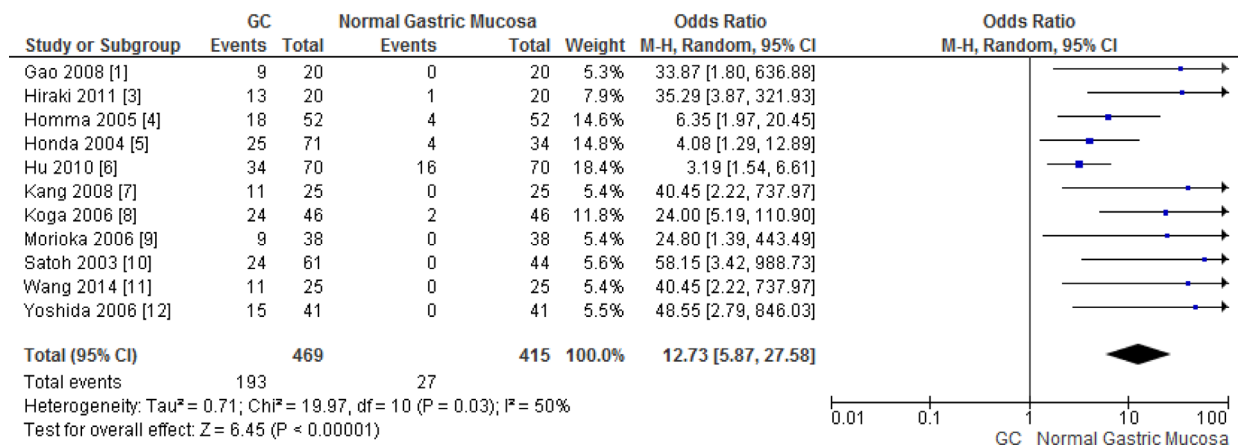

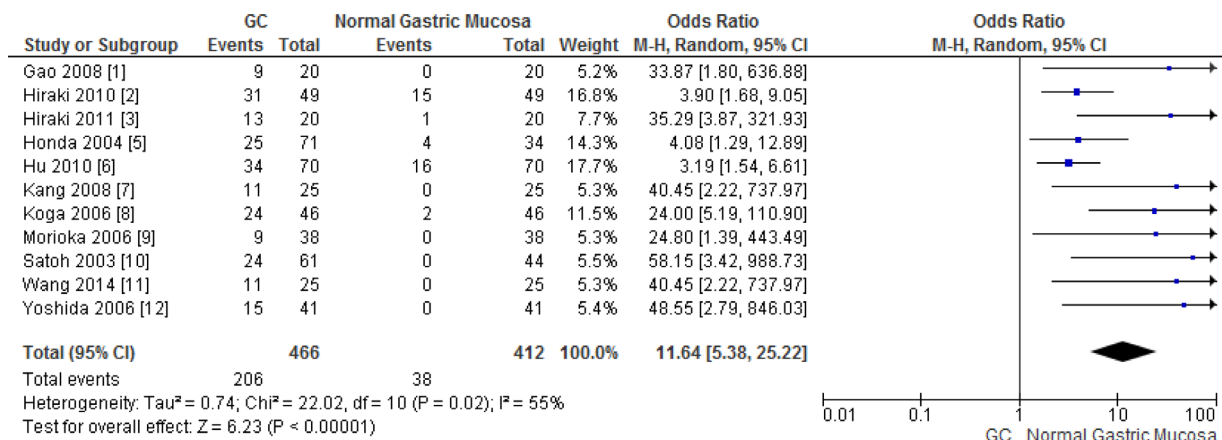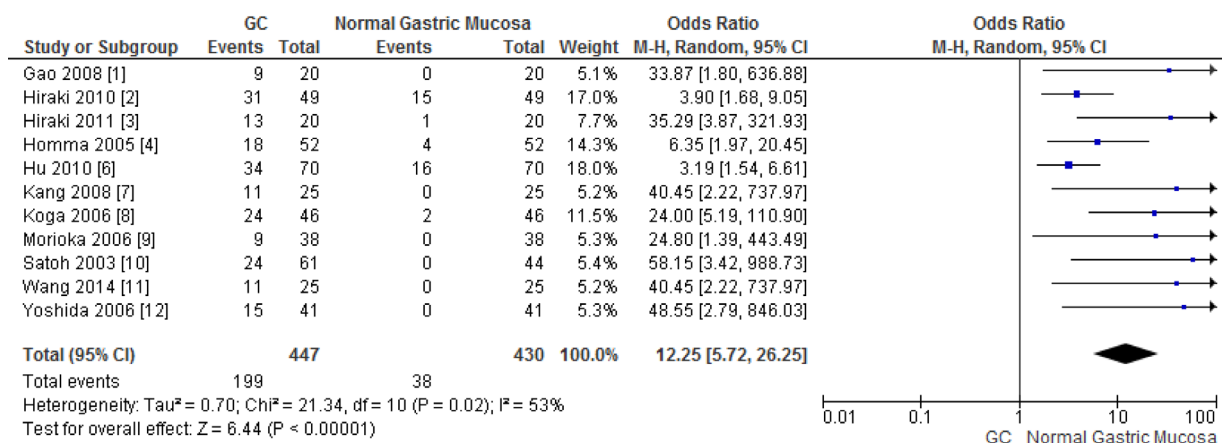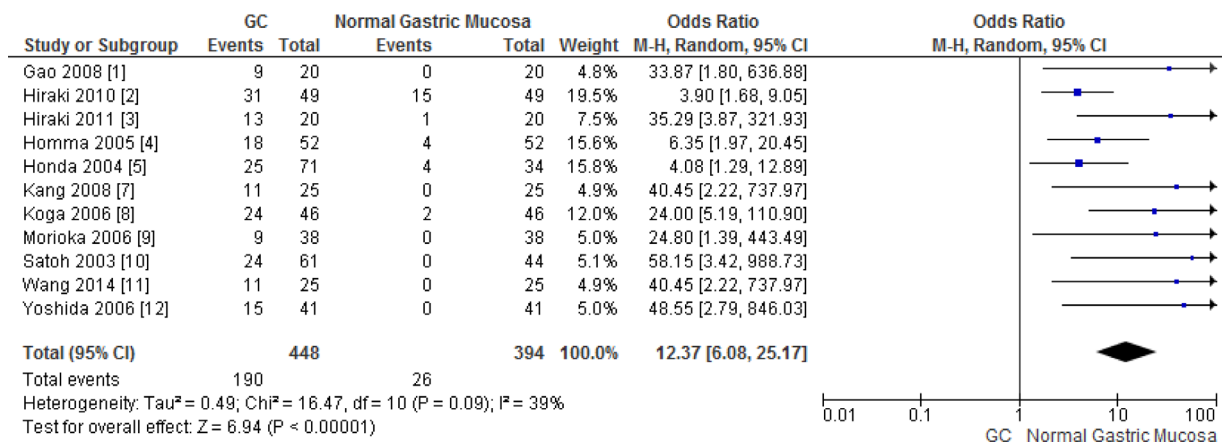

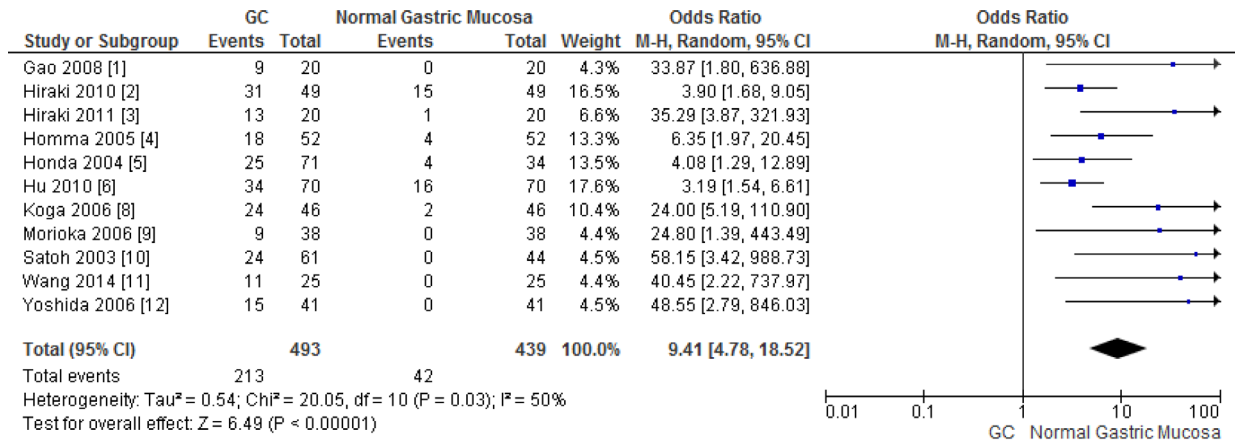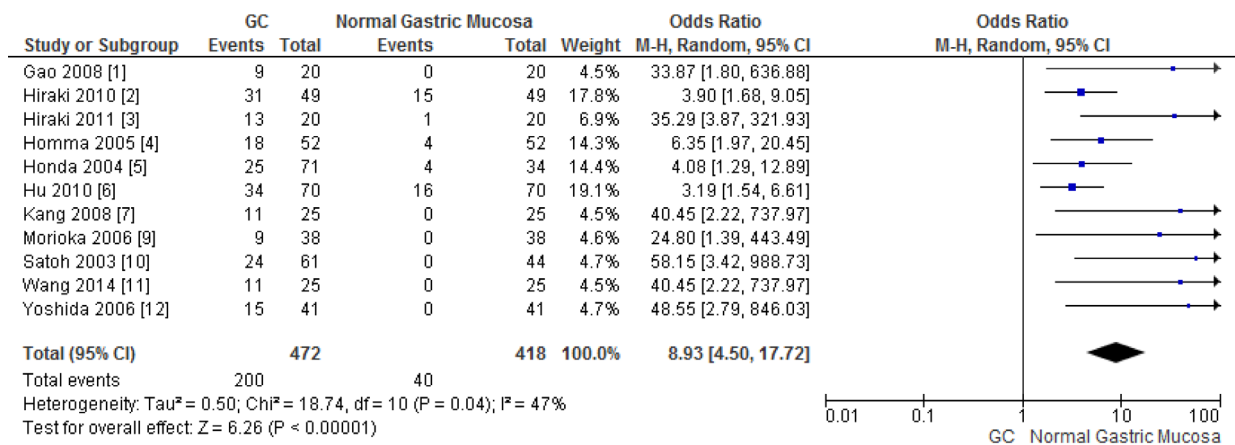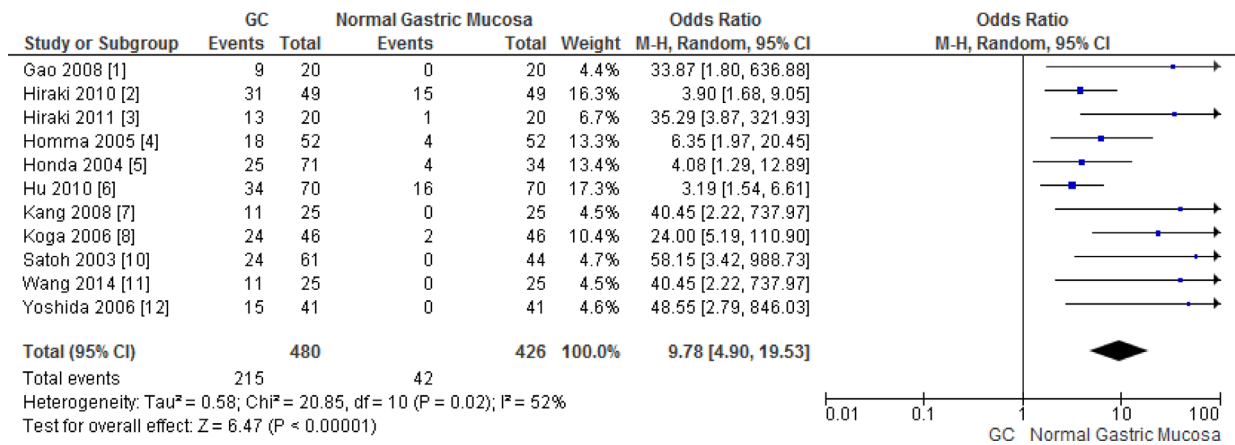

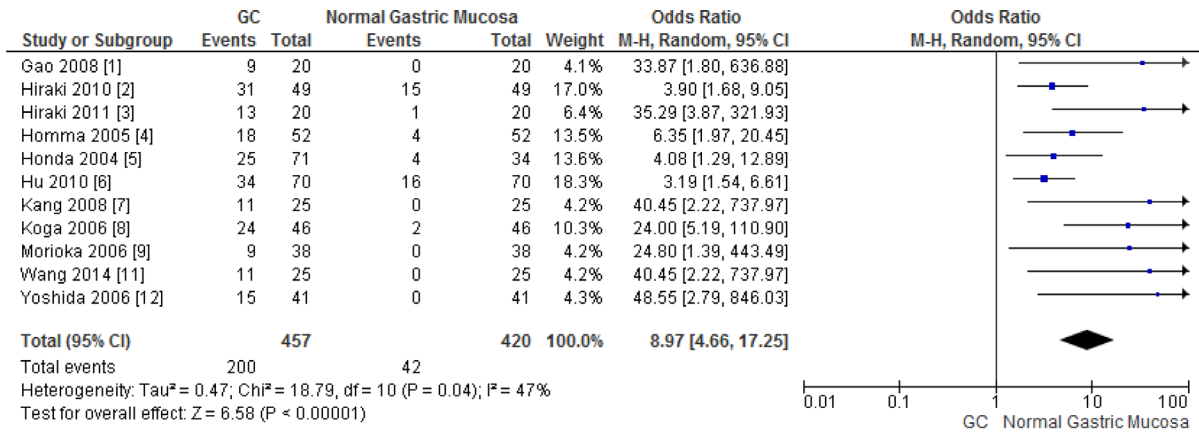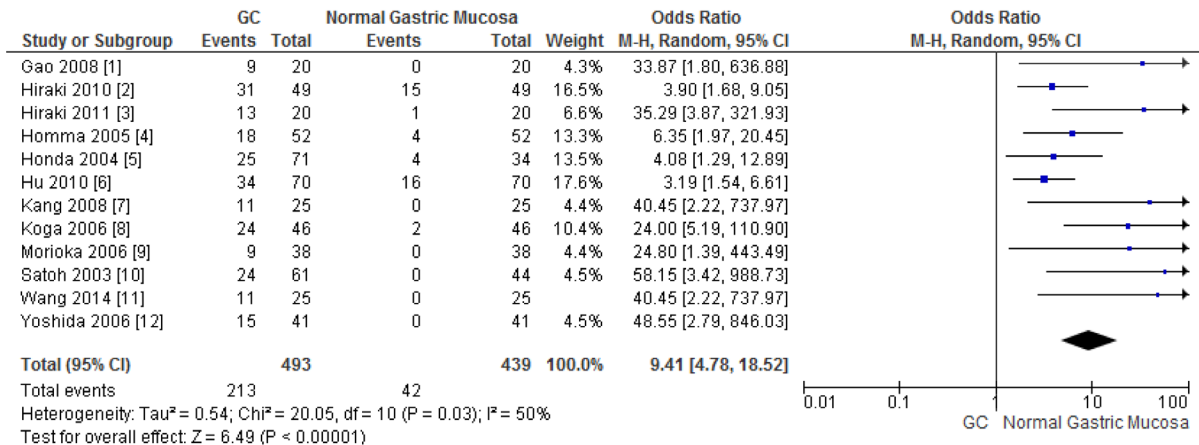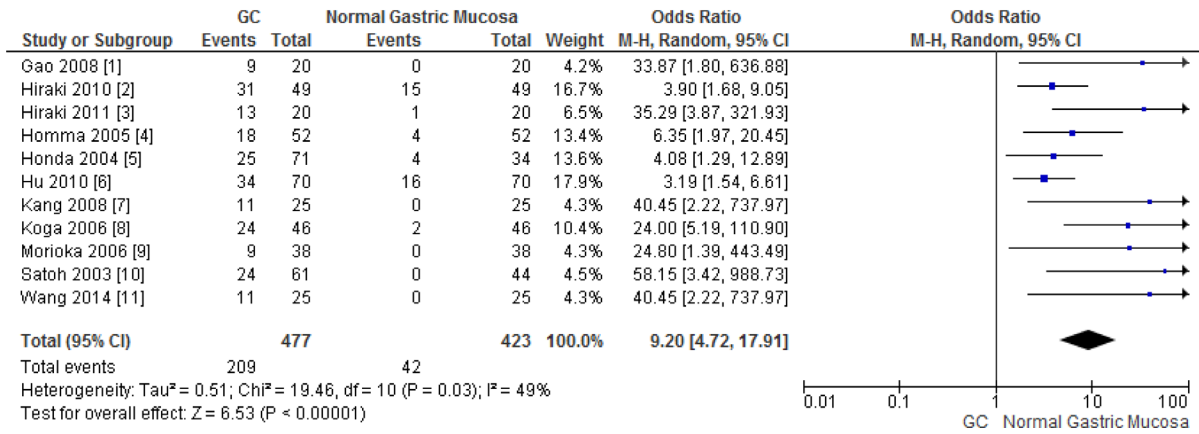

Supplementary Figure 1: Sensitivity analysis for *CHFR* promoter methylation in GC and normal gastric tissue.

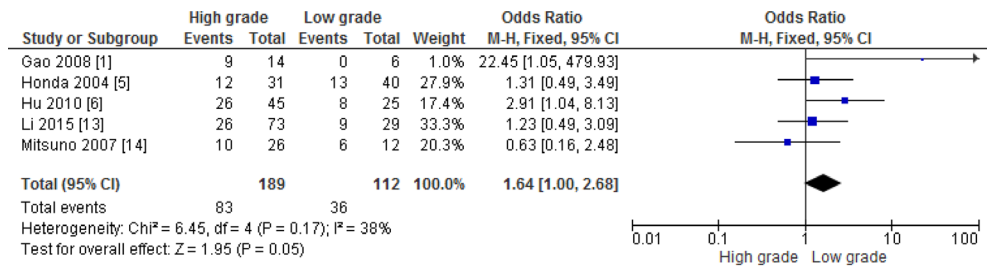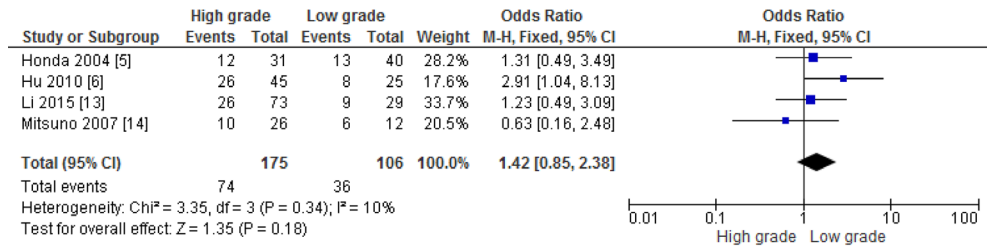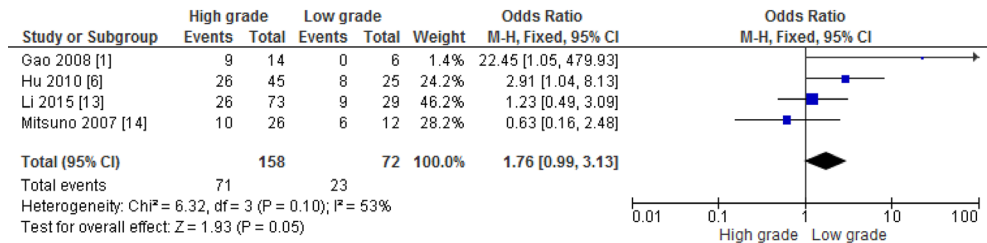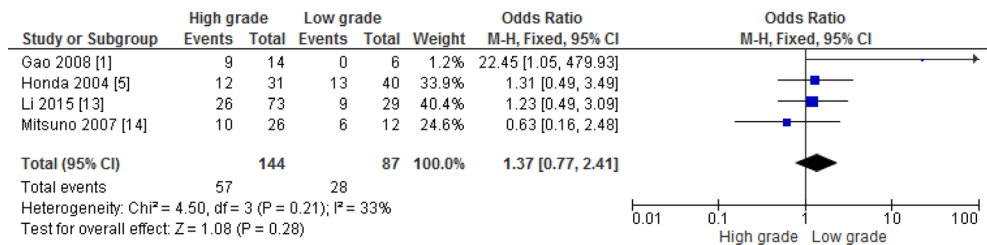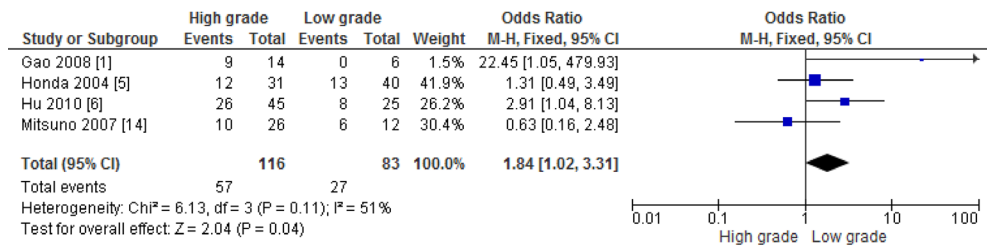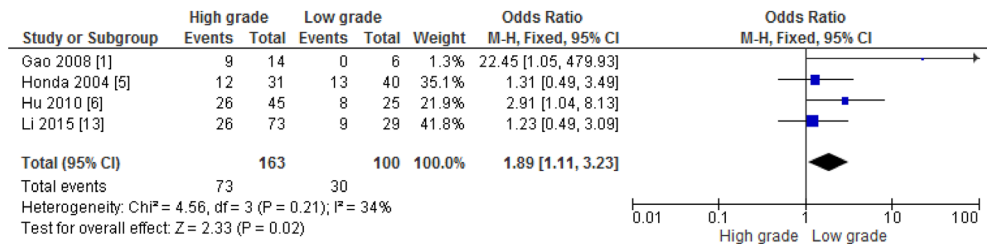

Supplementary Figure 2: Sensitivity analysis for *CHFR* promoter methylation in different grade of GC.

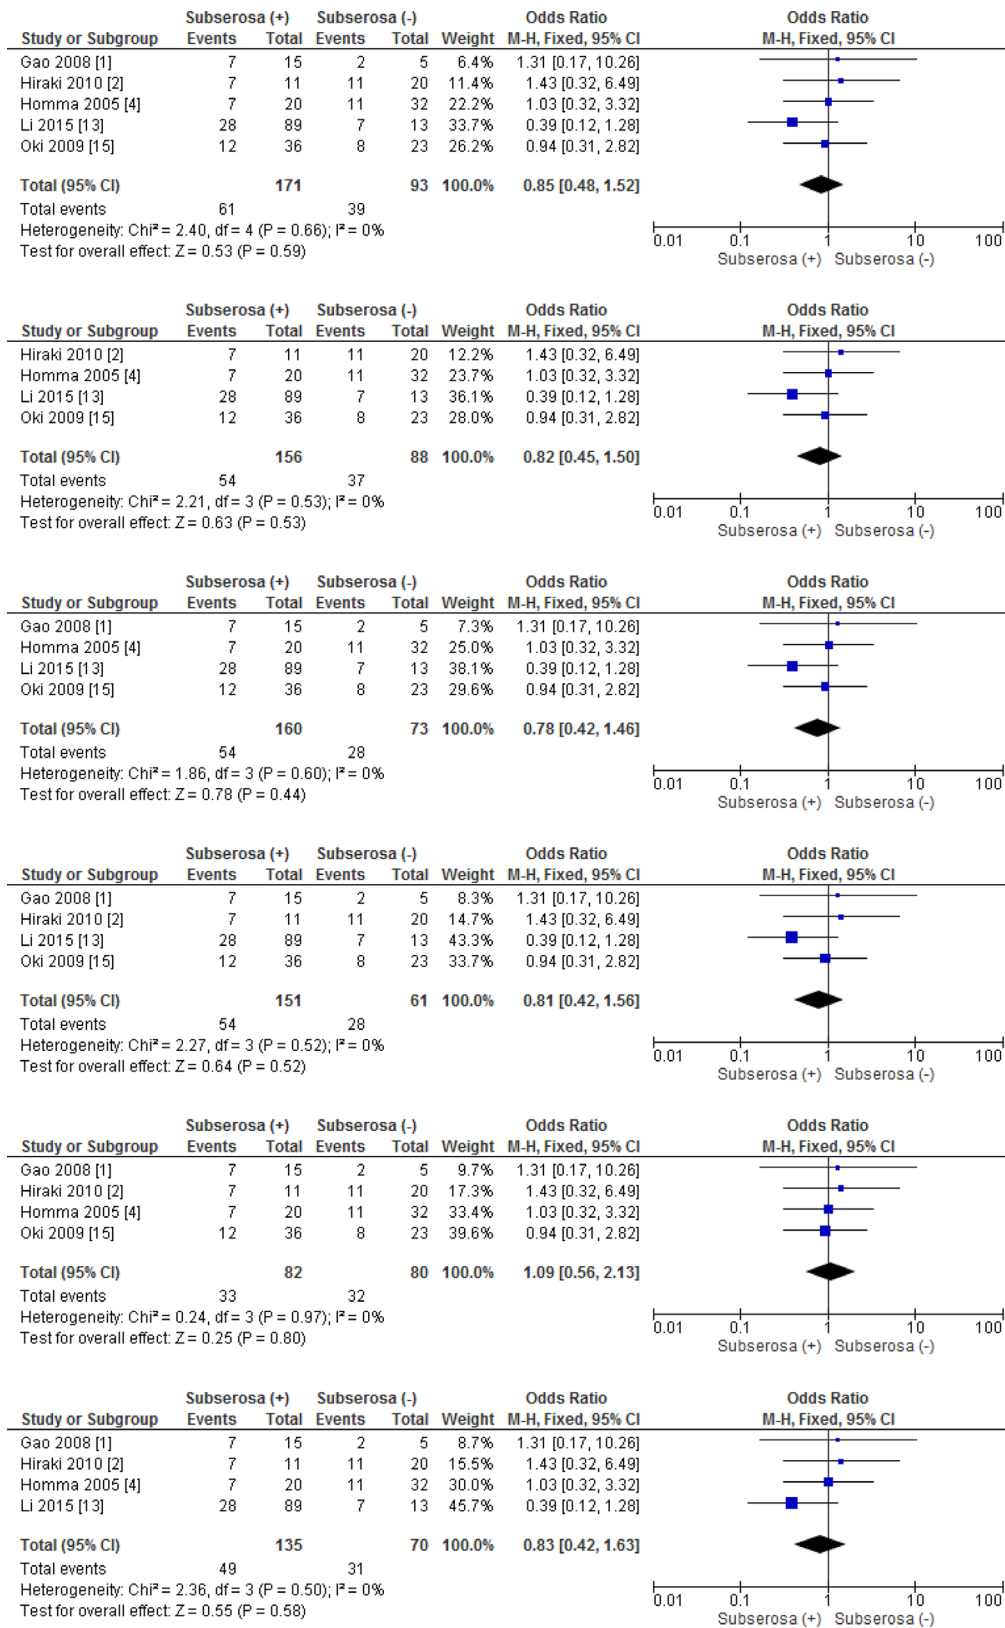

Supplementary Figure 3: Sensitivity analysis for *CHFR* promoter methylation in different invasion status of GC.

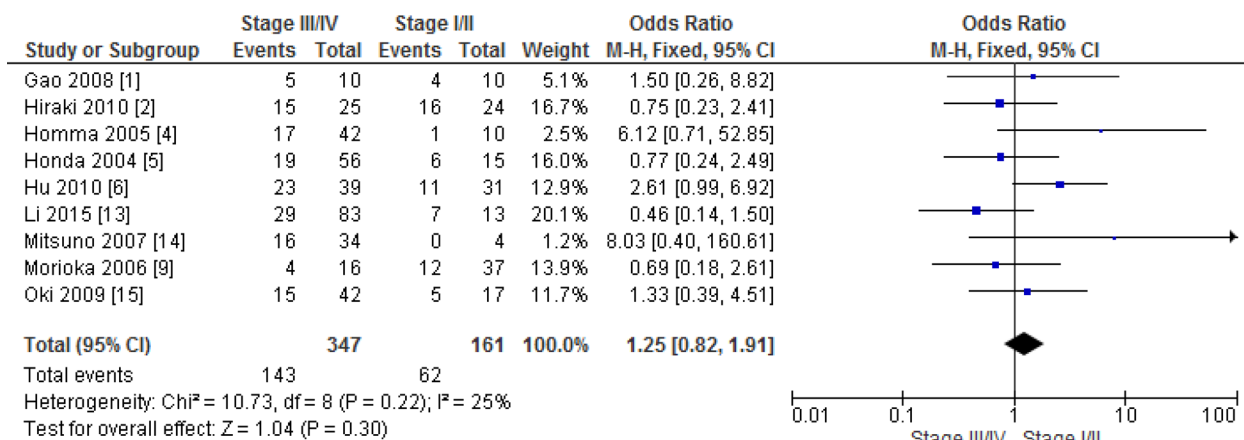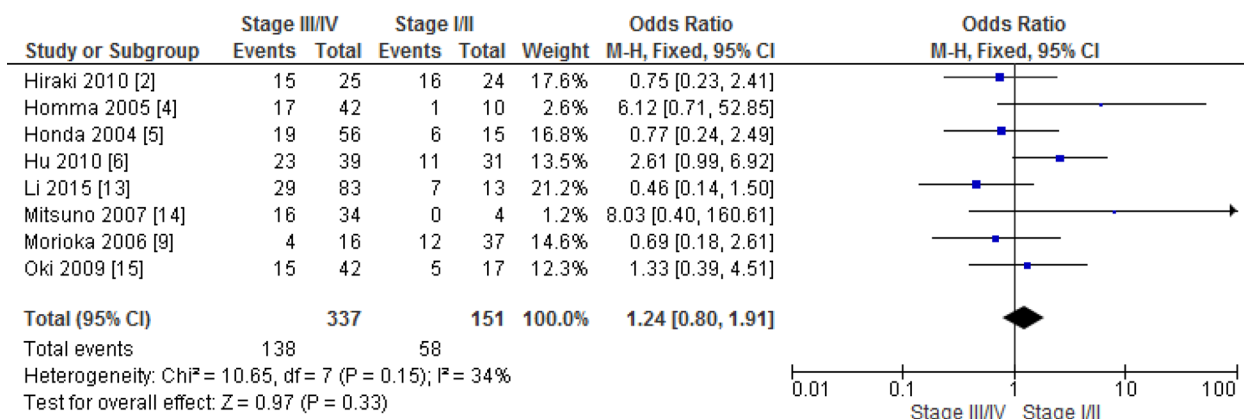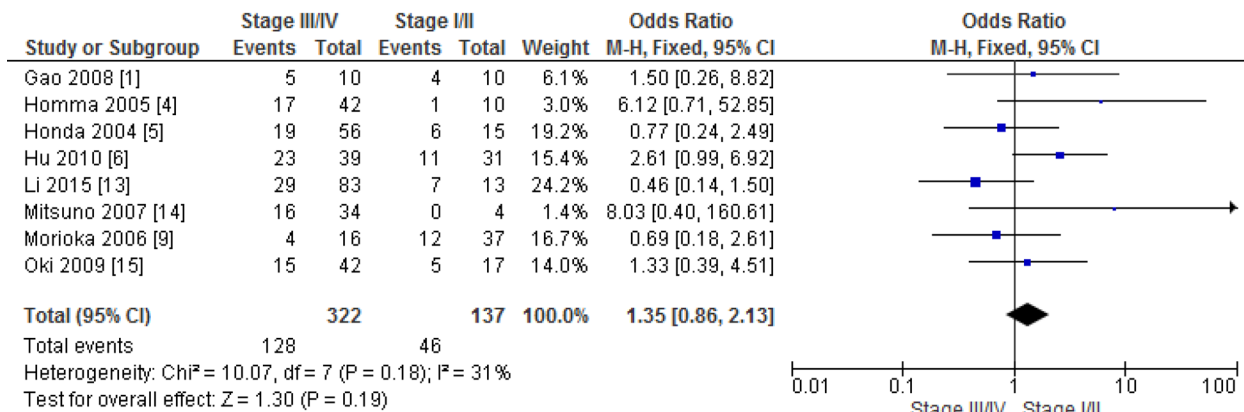

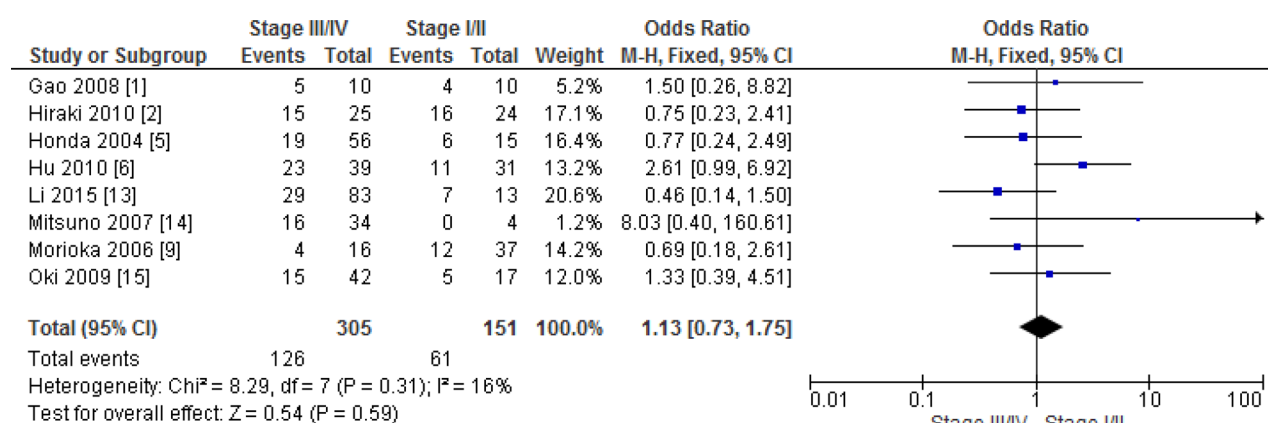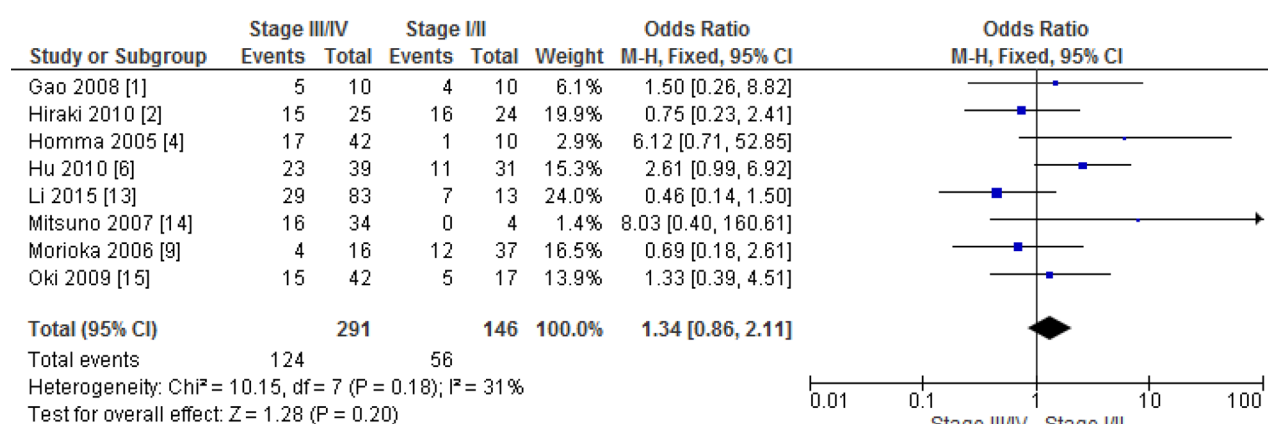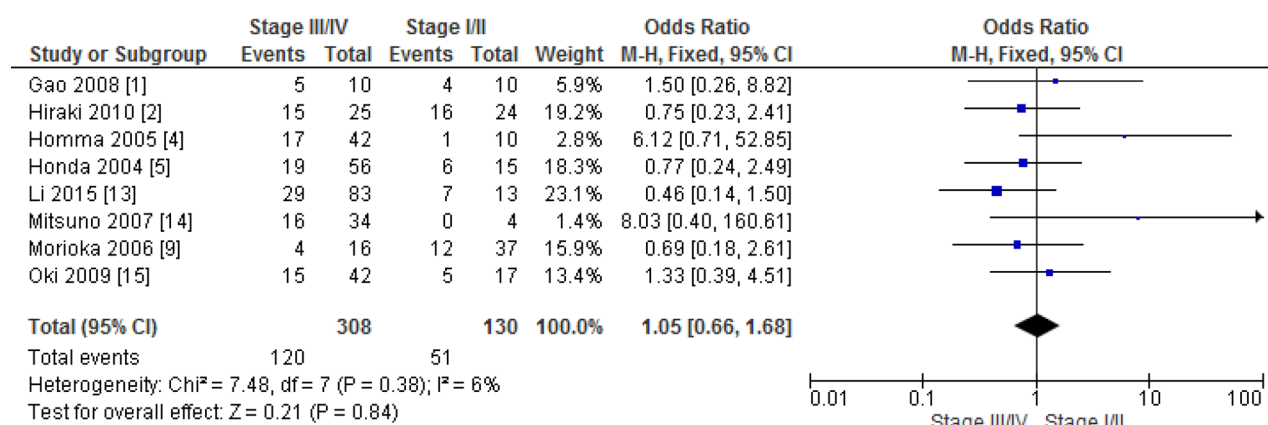



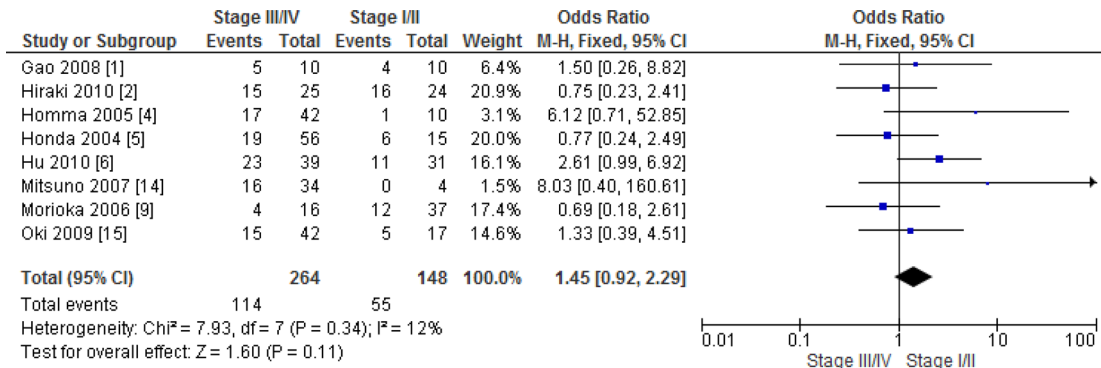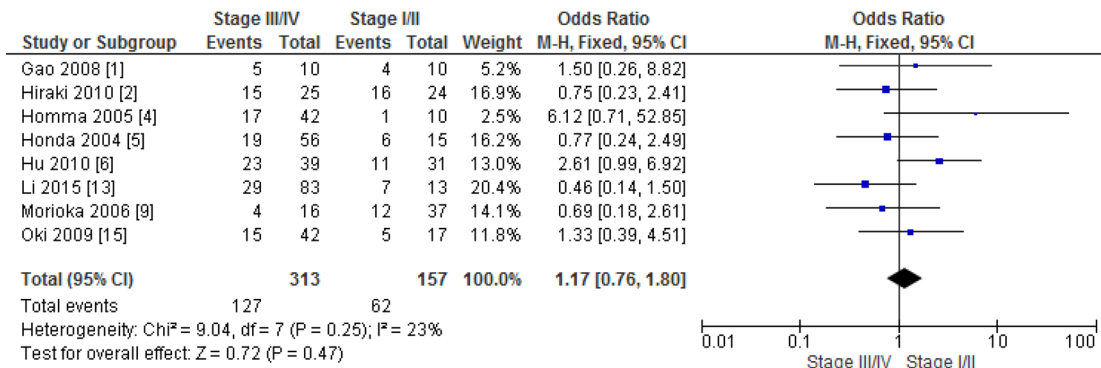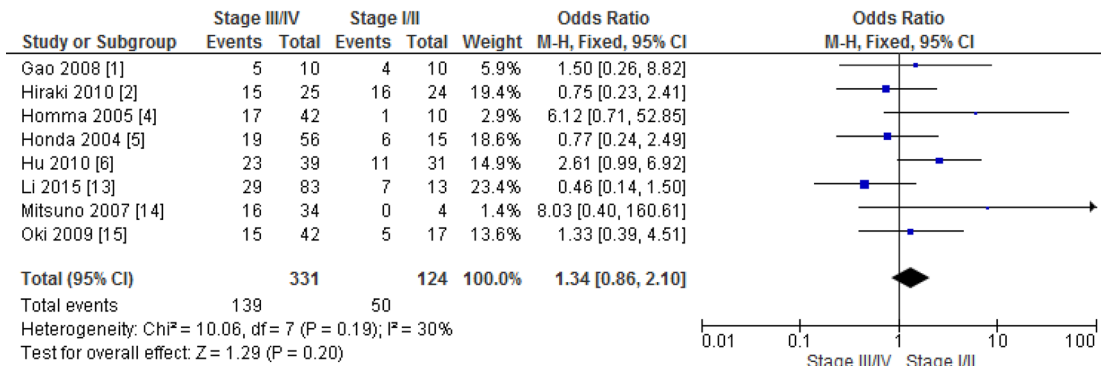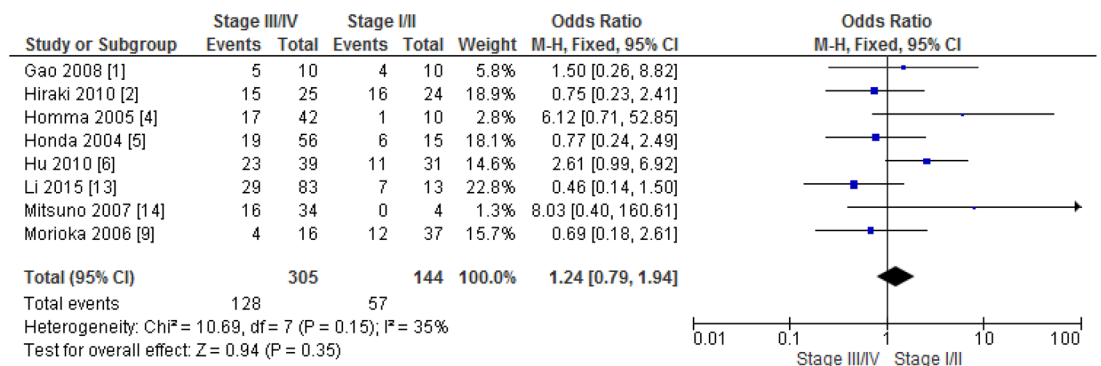

Supplementary Figure 4: Sensitivity analysis for *CHFR* promoter methylation in GC stage III/IV and stage I/II.

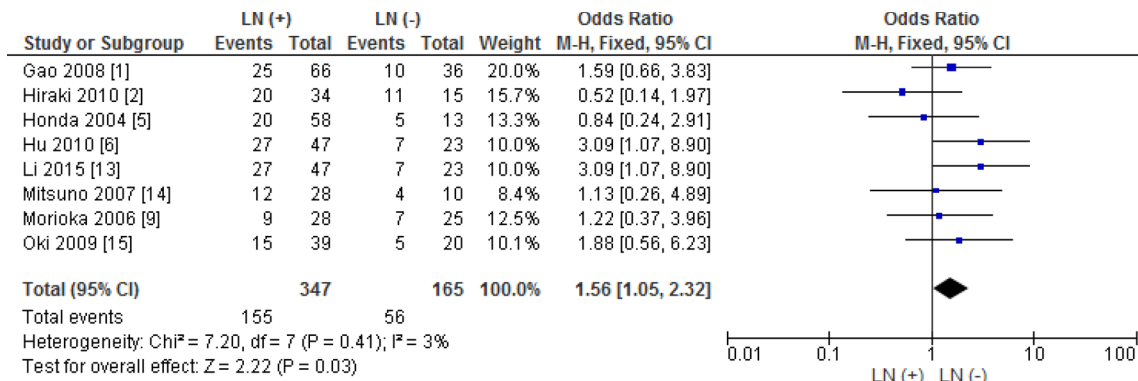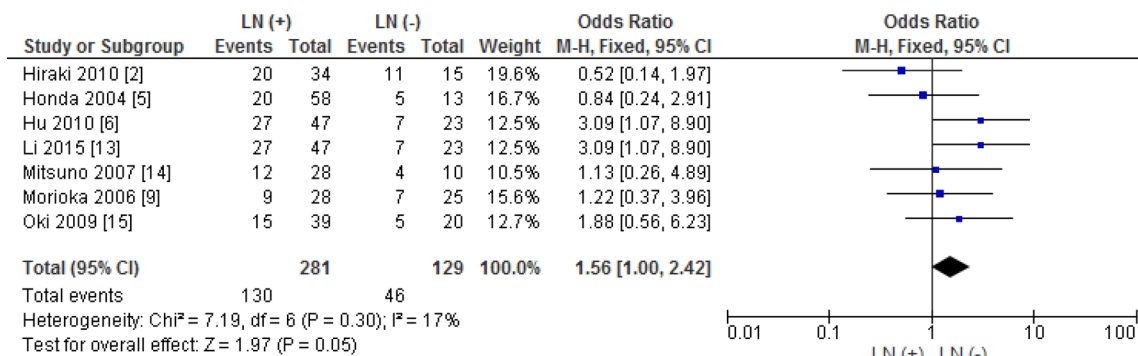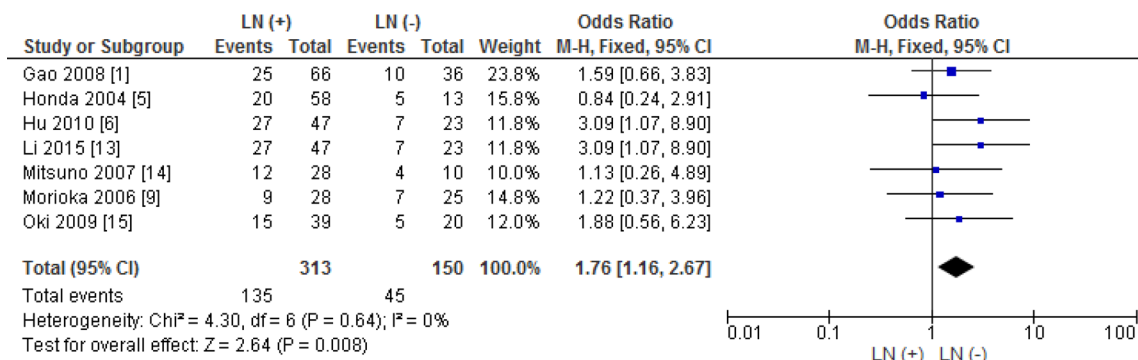

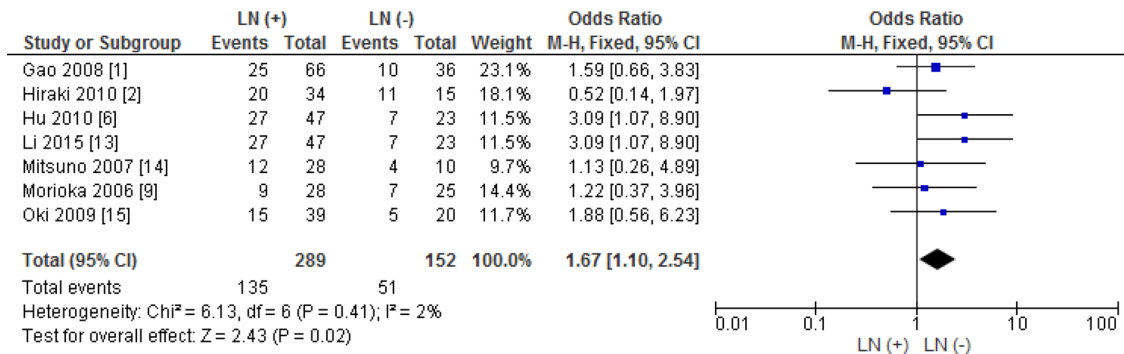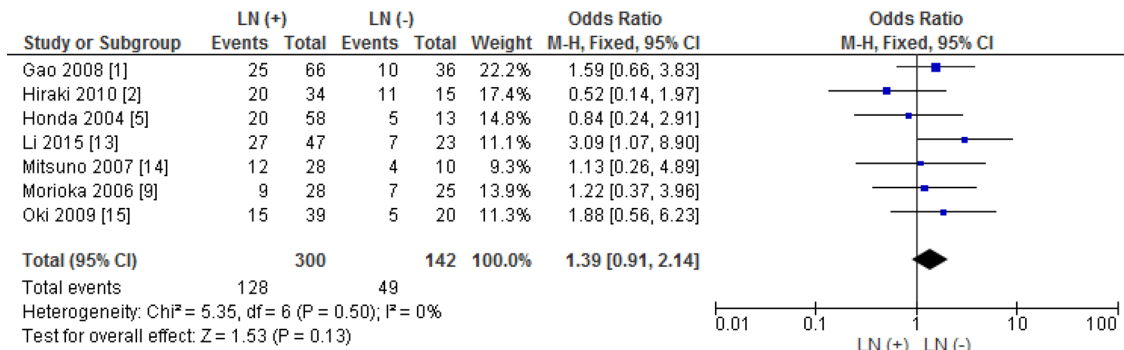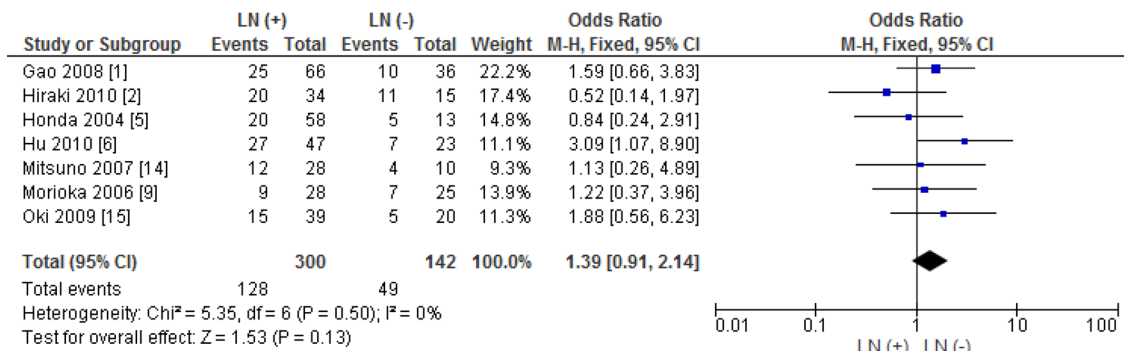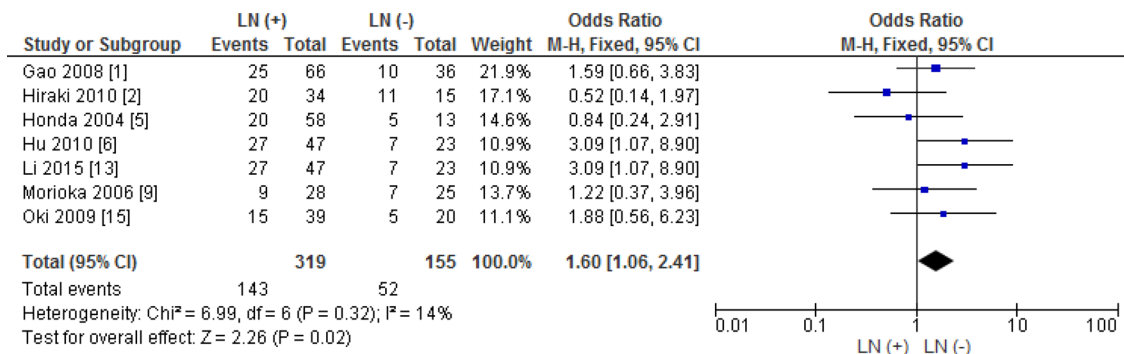

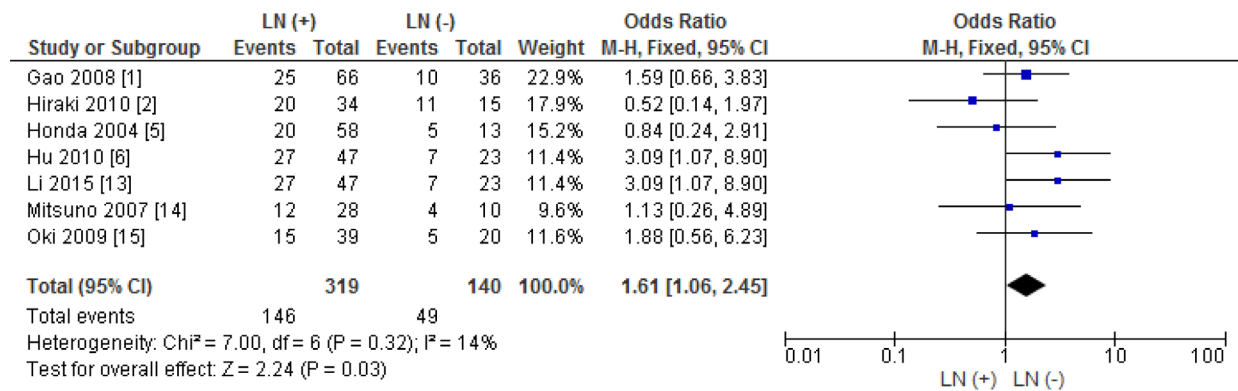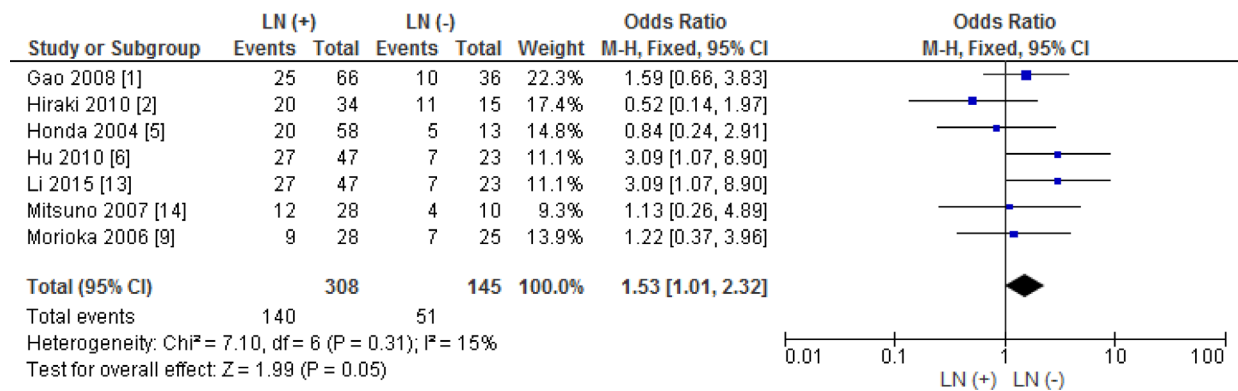

Supplementary Figure 5: Sensitivity analysis for *CHFR* promoter methylation in different status of lymph node metastasis.

## REFERENCES

1. Gao YJ, Xin Y, Zhang JJ, Zhou J. Mechanism and pathobiologic implications of CHFR promoter methylation in gastric carcinoma. *World J Gastroenterol*. 2008; 14:5000–07. <https://doi.org/10.3748/wjg.14.5000>.
2. Hiraki M, Kitajima Y, Sato S, Mitsuno M, Koga Y, Nakamura J, Hashiguchi K, Noshiro H, Miyazaki K. Aberrant gene methylation in the lymph nodes provides a possible marker for diagnosing micrometastasis in gastric cancer. *Ann Surg Oncol*. 2010; 17:1177–86. <https://doi.org/10.1245/s10434-009-0815-8>.
3. Hiraki M, Kitajima Y, Koga Y, Tanaka T, Nakamura J, Hashiguchi K, Noshiro H, Miyazaki K. Aberrant gene methylation is a biomarker for the detection of cancer cells in peritoneal wash samples from advanced gastric cancer patients. *Ann Surg Oncol*. 2011; 18:3013–19. <https://doi.org/10.1245/s10434-011-1636-0>.
4. Homma N, Tamura G, Honda T, Jin Z, Ohmura K, Kawata S, Motoyama T. Hypermethylation of Chfr and hMLH1 in gastric noninvasive and early invasive neoplasias. *Virchows Arch*. 2005; 446:120–26. <https://doi.org/10.1007/s00428-004-1146-6>.
5. Honda T, Tamura G, Waki T, Kawata S, Nishizuka S, Motoyama T. Promoter hypermethylation of the Chfr gene in neoplastic and non-neoplastic gastric epithelia. *Br J Cancer*. 2004; 90:2013–16. <https://doi.org/10.1038/sj.bjc.6601849>.
6. Hu SL, Kong XY, Cheng ZD, Sun YB, Shen G, Xu WP, Wu L, Xu XC, Jiang XD, Huang DB. Promoter methylation of p16, Runx3, DAPK and CHFR genes is frequent in gastric carcinoma. *Tumori*. 2010; 96:726–33.
7. Kang GH, Lee S, Cho NY, Gandamihardja T, Long TI, Weisenberger DJ, Campan M, Laird PW. DNA methylation profiles of gastric carcinoma characterized by quantitative DNA methylation analysis. *Lab Invest*. 2008; 88:161–70. <https://doi.org/10.1038/labinvest.3700707>.
8. Koga Y, Kitajima Y, Miyoshi A, Sato K, Sato S, Miyazaki K. The significance of aberrant CHFR methylation for clinical response to microtubule inhibitors in gastric cancer. *J Gastroenterol*. 2006; 41:133–39. <https://doi.org/10.1007/s00535-005-1732-7>.
9. Morioka Y, Hibi K, Sakai M, Koike M, Fujiwara M, Kodera Y, Ito K, Nakao A. Aberrant methylation of the CHFR gene in digestive tract cancer. *Anticancer Res*. 2006; 26:1791–95.
10. Satoh A, Toyota M, Itoh F, Sasaki Y, Suzuki H, Ogi K, Kikuchi T, Mita H, Yamashita T, Kojima T, Kusano M, Fujita M, Hosokawa M, et al. Epigenetic inactivation of CHFR and sensitivity to microtubule inhibitors in gastric cancer. *Cancer Res*. 2003; 63:8606–13.
11. Wang M, Shen L, Deng D. Association between CHFR methylation and chemosensitivity of paclitaxel in advanced gastric cancer. *Med Oncol*. 2014; 31:907. <https://doi.org/10.1007/s12032-014-0907-6>.
12. Yoshida K, Hamai Y, Suzuki T, Sanada Y, Oue N, Yasui W. DNA methylation of CHFR is not a predictor of the response to docetaxel and paclitaxel in advanced and recurrent gastric cancer. *Anticancer Res*. 2006; 26:49–54.
13. Li Y, Yang Y, Lu Y, Herman JG, Brock MV, Zhao P, Guo M. Predictive value of CHFR and MLH1 methylation in human gastric cancer. *Gastric Cancer*. 2015; 18:280–87. <https://doi.org/10.1007/s10120-014-0370-2>.
14. Mitsuno M, Kitajima Y, Ide T, Ohtaka K, Tanaka M, Satoh S, Miyazaki K. Aberrant methylation of p16 predicts candidates for 5-fluorouracil-based adjuvant therapy in gastric cancer patients. *J Gastroenterol*. 2007; 42:866–73. <https://doi.org/10.1007/s00535-007-2113-1>.
15. Oki E, Zhao Y, Yoshida R, Masuda T, Ando K, Sugiyama M, Tokunaga E, Morita M, Kakeji Y, Maehara Y. Checkpoint with forkhead-associated and ring finger promoter hypermethylation correlates with microsatellite instability in gastric cancer. *World J Gastroenterol*. 2009; 15:2520–25. <https://doi.org/10.3748/wjg.15.2520>.
